# Supplementary material
Source: publisher site journal article supplement (https://www.dovepress.com/article/417357)
Supplement: Supplementary file 1 [file get_supplementary_file.php]

1 ORIGINAL RESEARCH

2 Rocher et al

3 **Intraocular lens unfurling time exponentially decays**  
4 **with increased solution temperature**

5 Erick E Rocher<sup>1</sup>, Rishima Mukherjee<sup>1</sup>, James Pitingolo<sup>1</sup>, Eli Levenshus<sup>1</sup>, Gwyneth Alexander<sup>1</sup>,  
6 Minyoung Park<sup>1</sup>, Rupsa Acharya<sup>1</sup>, Sarah Khan<sup>1</sup>, Jordan Shuff<sup>1</sup>, Andres Aguirre<sup>1</sup>, Shababa Matin<sup>2</sup>,  
7 Keith Walter<sup>3</sup>, Allen Eghrari<sup>4</sup>

8

9 <sup>1</sup>Center for Bioengineering Innovation and Design, Department of Biomedical Engineering, Johns  
10 Hopkins University, Baltimore, MD, United States; <sup>2</sup>Rice 360 Institute for Global Health  
11 Technologies, Rice University, Houston, TX, United States; <sup>3</sup>Department of Ophthalmology,  
12 Wake Forest Baptist Health, Winston-Salem, NC, United States; <sup>4</sup>Department of Ophthalmology,  
13 Wilmer Eye Institute, Johns Hopkins University School of Medicine, Baltimore, MD, United States

14

15 Correspondence: Allen Eghrari

16 Department of Ophthalmology, Wilmer Eye Institute, Johns Hopkins University School of  
17 Medicine, 400 N Broadway, Smith 5013, Baltimore, MD, United States, 21231

18 Email [allen@jhmi.edu](mailto:allen@jhmi.edu)

19

20 **Supplementary Materials**

21

22

23

24

25

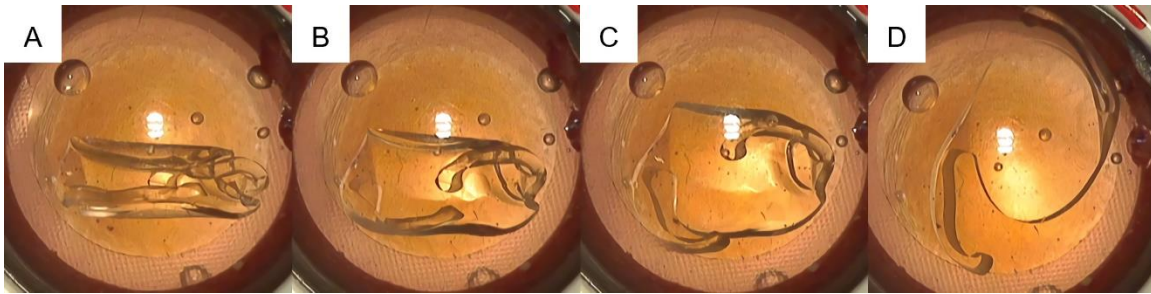

26

27 **Figure S1** IOL unfurling stages over time. This standardization allowed for consistent and  
 28 unambiguous assessment of IOL unfurling following injection. **(A)** IOLs initially were fully furled  
 29 with both haptics stuck to the optic. **(B)** Often, one haptic became free of the optic prior to the  
 30 other haptic. **(C)** Eventually, both haptics were free of the optic. **(D)** IOLs were determined to be  
 31 fully unfurled when the optic was round and planar. IOL = intraocular lens.

32

33 **Table S1** Descriptive statistics of IOL diopter used in each study. Multifocal IOLs are +3.0D and  
 34 toric IOLs are 1.50-3.00 CYL.

| Environment  | Solution       | Optic Type | Mean  | SD   | Minimum | Maximum |
|--------------|----------------|------------|-------|------|---------|---------|
| 6-well plate | BSS            | Toric      | 29.69 | 0.36 | 29.0    | 30.0    |
| 6-well plate | BSS            | Monofocal  | 23.94 | 1.25 | 23.0    | 25.5    |
| 6-well plate | BSS            | Multifocal | 25.31 | 0.36 | 25.0    | 26.0    |
| 6-well plate | Dispersive OVD | Toric      | 28.88 | 0.34 | 28.5    | 29.5    |
| 6-well plate | Cohesive OVD   | Toric      | 28.94 | 0.57 | 28.0    | 30.0    |
| 6-well plate | Dispersive OVD | Monofocal  | 21.69 | 0.96 | 20.0    | 23.0    |
| 6-well plate | Cohesive OVD   | Monofocal  | 20.88 | 1.26 | 19.5    | 23.0    |
| Plastic Eye  | Dispersive OVD | Toric      | 26.67 | 0.65 | 26.0    | 27.5    |
| Plastic Eye  | Cohesive OVD   | Toric      | 26.67 | 0.65 | 26.0    | 27.5    |

35

IOL = intraocular lens, BSS = balanced salt solution, OVD = ophthalmic viscoelastic device.

36

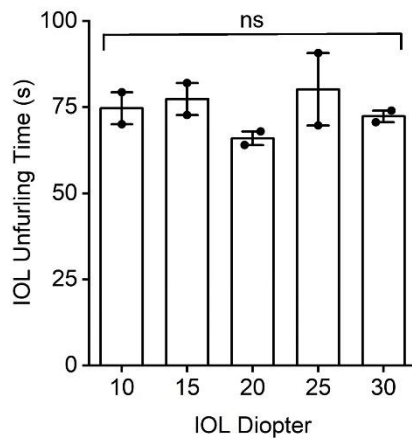

37

38 **Figure S2** IOL unfurling time is not affected by diopter *in vitro*. Toric IOLs (AcrySof SA6AT3,  
 39 Alcon, Geneva, Switzerland) of diopters ranging from 10 to 30 were injected into a 6-well plate  
 40 filled with BSS. The entirety of the experiment was conducted at room temperature (22°C). IOL =  
 41 intraocular lens, BSS = balanced salt solution.

42

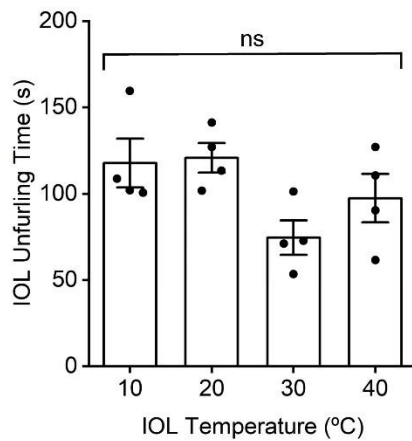

43

44 **Figure S3** Modulating the temperature of the IOL prior to injection did not significantly affect  
 45 unfurling time *in vitro*. IOL diopters used in this study ranged from 24.5 to 25. IOL = intraocular  
 46 lens.

47

48 **Table S2** Fitted functions for each model, determined from trials ranging from 20°C to 40°C. All  
 49 models are two-parameter exponential functions (shown below). Significance was determined at  
 50 the 0.05 level by comparing the fitted function against a function of constant IOL unfurling time.

51 
$$y = ae^{bx}$$

52  $y$  = intraocular lens unfurling time (s),  $x$  = solution temperature of respective model (°C)

| Environment  | Solution       | Optic Type | $a \pm SE$      | $b \pm SE$         | $R^2$ | Significance |
|--------------|----------------|------------|-----------------|--------------------|-------|--------------|
| 6-well plate | BSS            | Toric      | 17989 ± 53409   | -0.23244 ± 0.14756 | 0.731 | $P < 0.001$  |
| 6-well plate | BSS            | Monofocal  | 72877 ± 85615   | -0.29821 ± 0.05864 | 0.986 | $P < 0.0001$ |
| 6-well plate | BSS            | Multifocal | 30383 ± 38086   | -0.26368 ± 0.06248 | 0.967 | $P < 0.0001$ |
| 6-well plate | Dispersive OVD | Toric      | 30644 ± 85980   | -0.23304 ± 0.13945 | 0.738 | $P < 0.0001$ |
| 6-well plate | Cohesive OVD   | Toric      | 3879.9 ± 1739.5 | -0.16192 ± 0.02186 | 0.961 | $P < 0.0001$ |
| 6-well plate | Dispersive OVD | Monofocal  | 14476 ± 22317   | -0.21515 ± 0.07643 | 0.866 | $P < 0.0001$ |
| 6-well plate | Cohesive OVD   | Monofocal  | 7306.2 ± 4068.7 | -0.1823 ± 0.02739  | 0.962 | $P < 0.0001$ |

53 IOL = intraocular lens, BSS = balanced salt solution, OVD = ophthalmic viscoelastic device.
